# Supplementary material for: Cisplatin enhances cell stiffness and decreases invasiveness rate in prostate cancer cells by actin accumulation
Source: PubMed Central journal article supplement (PMC6367361; doi:10.1038/s41598-018-38199-7), 2019-02-07
Supplement: 41598_2018_38199_MOESM1_ESM.pdf [file 41598_2018_38199_MOESM1_ESM.pdf]

# Cisplatin enhances cell stiffness and decreases invasiveness rate in prostate cancer cells by actin accumulation

Martina Raudenska<sup>1×</sup>, Monika Kratochvilova<sup>1×</sup>, Tomas Vicar<sup>2,3</sup>, Jaromir Gumulec<sup>1,2,4</sup>, Jan Balvan<sup>1,2,4</sup>, Hana Polanska<sup>2</sup>, Jan Pribyl<sup>5</sup>, and Michal Masarik<sup>1,2,4\*</sup>

<sup>1</sup>Department of Physiology, Faculty of Medicine, Masaryk University / Kamenice 5, CZ-625 00 Brno, Czech Republic

<sup>2</sup>Department of Pathological Physiology, Faculty of Medicine, Masaryk University / Kamenice 5, CZ-625 00 Brno, Czech Republic

<sup>3</sup>Department of Biomedical Engineering, Faculty of Electrical Engineering and Communication, Brno University of Technology, Technicka 3058/10, CZ-616 00 Brno, Czech Republic

<sup>4</sup>Central European Institute of Technology, Brno University of Technology, Technicka 3058/10, CZ-616 00 Brno, Czech Republic

<sup>5</sup>Central European Institute of Technology, Masaryk University/ Kamenice 5, CZ-625 00 Brno, Czech Republic

\*Dr. Michal Masarik, Department of Physiology and Pathological Physiology, Faculty of Medicine, Masaryk University, Kamenice 5, CZ-625 00 Brno, Czech Republic; E-mail: [masarik@med.muni.cz](mailto:masarik@med.muni.cz) Phone: +420-5-4949-3631; fax: +420-5-4949-4340

<sup>×</sup>Martina Raudenska and Monika Kratochvilova contributed equally to this work.

## Supplementa

**Table S1: Summary of statistics used throughout the study**

(page 2)

**Figure S1: Confocal microscopy of cell lines exposed to cisplatin, docetaxel and zinc.**

(page 5)

**Table S2: Changes of actin and tubulin, analysis of confocal microscopy**

(page 7)

**Table S1: Summary of statistics used throughout the study.** Values shown as median and interquartile range (IQR). Lilliefors test used for normality analysis. \* indicates Kruskal-Wallis test used instead of ANOVA for this comparison. † for colony forming analysis, N reflects number of chamber wells instead of the number of analyzed cells as in the other analyses.

| <b>Untreated cells</b>           |           |                        |                  |           |                  |                  |               |               |
|----------------------------------|-----------|------------------------|------------------|-----------|------------------|------------------|---------------|---------------|
| Modality                         | Cell line | median (IQR)           | N                | normality | ANOVA/KW p value |                  |               |               |
|                                  |           |                        |                  | p         | vs. 22Rv1        | vs. LNCaP        | vs. PC-3      |               |
| Young Modulus (kPa)              |           |                        |                  |           |                  |                  |               |               |
|                                  | PNT1A     | 1.15 (0.64-1.53)       | 64               | 0.221     | 0.001            | 0.763            | 0.343         |               |
|                                  | 22Rv1     | 0.67 (0.39-0.81)       | 20               | 0.500     |                  | 0.009            | <0.001        |               |
|                                  | LNCaP     | 0.95 (0.68-1.36)       | 68               | 0.003     |                  |                  | 0.053         |               |
|                                  | PC-3      | 1.21 (0.78-1.74)       | 42               | 0.374     |                  |                  |               |               |
| Cell Mass (pg/μm <sup>2</sup> )* |           |                        |                  |           |                  |                  |               |               |
|                                  | PNT1A     | 409.34 (358.62-517.73) | 77               | 0.001     | <0.001           | 0.019            | 0.889         |               |
|                                  | 22Rv1     | 196.06 (171.27-223.95) | 99               | 0.001     |                  | <0.001           | <0.001        |               |
|                                  | LNCaP     | 344.46 (281.12-489.13) | 104              | 0.001     |                  |                  | 0.786         |               |
|                                  | PC-3      | 375.34 (362.25-419.63) | 17               | 0.337     |                  |                  |               |               |
| Setpoint height (μm)*            |           |                        |                  |           |                  |                  |               |               |
|                                  | PNT1A     | 11.03 (8.73-13.26)     | 64               | 0.001     | 0.698            | 0.001            | <0.001        |               |
|                                  | 22Rv1     | 9.89 (7.48-11.61)      | 20               | 0.026     |                  | 0.437            | 0.039         |               |
|                                  | LNCaP     | 8.2 (6.88-11.05)       | 68               | 0.104     |                  |                  | 0.304         |               |
|                                  | PC-3      | 7.52 (5.8-9.54)        | 42               | 0.237     |                  |                  |               |               |
| <b>Treated cells cells</b>       |           |                        |                  |           |                  |                  |               |               |
| Modality                         | treatment | Cell line              | median (IQR)     | N         | normality        | ANOVA/KW p value |               |               |
|                                  |           |                        |                  |           | p                | vs. zinc         | vs. cisplatin | vs. docetaxel |
| Circularity (0-1)                |           |                        |                  |           |                  |                  |               |               |
|                                  | untreated | PNT1A                  | 0.58 (0.54-0.63) | 77        | 0.285            | 0.002            | 0.701         | <0.001        |
|                                  | zinc      | PNT1A                  | 0.49 (0.44-0.55) | 37        | 0.205            |                  | <0.001        | <0.001        |
|                                  | cisplatin | PNT1A                  | 0.57 (0.50-0.70) | 33        | 0.372            |                  |               | 0.025         |
|                                  | docetaxel | PNT1A                  | 0.68 (0.58-0.77) | 39        | 0.500            |                  |               |               |
|                                  | untreated | 22Rv1                  | 0.54 (0.45-0.66) | 99        | 0.055            | <0.001           | <0.001        | <0.001        |
|                                  | zinc      | 22Rv1                  | 0.42 (0.33-0.52) | 67        | 0.327            |                  | <0.001        | <0.001        |
|                                  | cisplatin | 22Rv1                  | 0.80 (0.65-0.90) | 187       | 0.001            |                  |               | 0.752         |
|                                  | docetaxel | 22Rv1                  | 0.72 (0.64-0.81) | 107       | 0.500            |                  |               |               |
|                                  | untreated | PC-3                   | 0.60 (0.50-0.76) | 17        | 0.500            | 0.608            | 0.305         | 1.000         |
|                                  | zinc      | PC-3                   | 0.58 (0.53-0.63) | 61        | 0.500            |                  | <0.001        | 0.599         |
|                                  | cisplatin | PC-3                   | 0.70 (0.57-0.83) | 118       | 0.249            |                  |               | 0.243         |
|                                  | docetaxel | PC-3                   | 0.60 (0.54-0.72) | 19        | 0.412            |                  |               |               |
| Migration speed (μm/min)*        |           |                        |                  |           |                  |                  |               |               |
|                                  | untreated | PNT1A                  | 2.26 (1.84-2.90) | 77        | 0.001            | 0.011            | 0.768         | 0.779         |
|                                  | zinc      | PNT1A                  | 3.19 (2.53-5.33) | 37        | 0.001            |                  | 0.003         | 0.003         |
|                                  | cisplatin | PNT1A                  | 1.57 (0.55-5.07) | 33        | 0.001            |                  |               | 1.000         |
|                                  | docetaxel | PNT1A                  | 2.1 (1.08-3.35)  | 39        | 0.005            |                  |               |               |
|                                  | untreated | 22Rv1                  | 3.11 (2.59-3.84) | 99        | 0.001            | 0.961            | <0.001        | 0.006         |
|                                  | zinc      | 22Rv1                  | 3.16 (2.46-4.21) | 67        | 0.001            |                  | <0.001        | 0.003         |
|                                  | cisplatin | 22Rv1                  | 0.73 (0.40-2.67) | 187       | 0.001            |                  |               | <0.001        |
|                                  | docetaxel | 22Rv1                  | 2.00 (1.13-3.74) | 107       | 0.001            |                  |               |               |

|                                         |          |                        |     |       |        |        |        |
|-----------------------------------------|----------|------------------------|-----|-------|--------|--------|--------|
| untreated                               | PC-3     | 5.06 (4.56-5.91)       | 17  | 0.011 | 0.005  | <0.001 | 0.377  |
| zinc                                    | PC-3     | 2.79 (2.19-3.52)       | 61  | 0.001 |        | <0.001 | 0.467  |
| cisplatin                               | PC-3     | 1.66 (1.16-2.47)       | 118 | 0.001 |        |        | <0.001 |
| docetaxel                               | PC-3     | 5.78 (1.65-6.98)       | 19  | 0.379 |        |        |        |
| Colony-forming assay (% covered area)*† |          |                        |     |       |        |        |        |
| untreated                               | PNT1A    | 10.29 (5.50-15.90)     | 6   | N/A   | 0.410  | <0.001 | 0.001  |
| zinc                                    | PNT1A    | 0.85 (0.60-1.67)       | 6   | N/A   |        | 0.069  | 0.126  |
| cisplatin                               | PNT1A    | 0                      | 6   | N/A   |        |        | 0.994  |
| docetaxel                               | PNT1A    | 0                      | 6   | N/A   |        |        |        |
| untreated                               | 22Rv1    | 6.73 (5.78-6.87)       | 3   | N/A   | 0.734  | 0.018  | 0.007  |
| zinc                                    | 22Rv1    | 1.36 (0.96-2.26)       | 6   | N/A   |        | 0.091  | 0.035  |
| cisplatin                               | 22Rv1    | 0.04 (0.01-0.09)       | 6   | N/A   |        |        | 0.982  |
| docetaxel                               | 22Rv1    | 0.02 (0.00-0.08)       | 6   | N/A   |        |        |        |
| untreated                               | PC-3     | 17.44 (14.19-17.71)    | 6   | N/A   | 0.336  | 0.108  | 0.472  |
| zinc                                    | PC-3     | 27.68 (24.04-32.91)    | 6   | N/A   |        | <0.001 | 0.025  |
| cisplatin                               | PC-3     | 0.04 (0.00-0.10)       | 6   | N/A   |        |        | 0.978  |
| docetaxel                               | PC-3     | 0.10 (0.03-0.19)       | 3   | N/A   |        |        |        |
| Cell Mass (pg/μm <sup>2</sup> )*        |          |                        |     |       |        |        |        |
| Untreated                               | PNT1A    | 409.34 (358.62-517.73) | 77  | 0.001 | 0.663  | 0.002  | 0.001  |
| Zinc                                    | PNT1A    | 386.18 (270.74-542.99) | 37  | 0.382 |        | 0.125  | 0.111  |
| Cisplatin                               | PNT1A    | 251.47 (180.42-445.67) | 33  | 0.015 |        |        | 1.000  |
| Docetaxel                               | PNT1A    | 292.58 (195.00-449.81) | 39  | 0.37  |        |        |        |
| Untreated                               | 22Rv1    | 196.06 (171.27-223.95) | 99  | 0.001 | <0.001 | <0.001 | 0.435  |
| Zinc                                    | 22Rv1    | 271.41 (211.34-548.02) | 67  | 0.001 |        | <0.001 | <0.001 |
| Cisplatin                               | 22Rv1    | 100.35 (73.54-170.18)  | 187 | 0.001 |        |        | <0.001 |
| Docetaxel                               | 22Rv1    | 179.13 (111.92-272.18) | 107 | 0.001 |        |        |        |
| Untreated                               | PC-3     | 375.34 (362.25-419.63) | 17  | 0.337 | <0.001 | <0.001 | <0.001 |
| Zinc                                    | PC-3     | 492.55 (396.37-553.06) | 61  | 0.001 |        | 0.997  | 0.656  |
| Cisplatin                               | PC-3     | 416.27 (335.15-540.55) | 118 | 0.004 |        |        | 0.853  |
| Docetaxel                               | PC-3     | 569.54 (485.98-757.39) | 19  | 0.182 |        |        |        |
| Untreated                               | together | 304.14 (192.15-408.32) | 193 | 0.001 | <0.001 | <0.001 | 0.014  |
| Zinc                                    | together | 423.19 (266.39-553.06) | 165 | 0.001 |        | <0.001 | <0.001 |
| Cisplatin                               | together | 226.93 (91.44-407.98)  | 338 | 0.001 |        |        | 0.951  |
| Docetaxel                               | together | 226.60 (130.55-354.48) | 165 | 0.001 |        |        |        |
| Young Modulus (kPa)*                    |          |                        |     |       |        |        |        |
| Untreated                               | PNT1A    | 1.15 (0.64-1.53)       | 64  | 0.221 | 0.536  | <0.001 | <0.001 |
| Zinc                                    | PNT1A    | 0.85 (0.61-1.23)       | 23  | 0.150 |        | <0.001 | <0.001 |
| Cisplatin                               | PNT1A    | 1.68 (1.24-2.09)       | 84  | 0.500 |        |        | 0.011  |
| Docetaxel                               | PNT1A    | 2.72 (1.60-3.78)       | 61  | 0.001 |        |        |        |
| Untreated                               | 22Rv1    | 0.67 (0.39-0.81)       | 20  | 0.500 | 0.275  | <0.001 | <0.001 |
| Zinc                                    | 22Rv1    | 0.97 (0.71-1.21)       | 23  | 0.257 |        | 0.014  | <0.001 |
| Cisplatin                               | 22Rv1    | 1.97 (1.01-3.00)       | 41  | 0.015 |        |        | 0.157  |
| Docetaxel                               | 22Rv1    | 2.42 (1.69-5.67)       | 26  | 0.001 |        |        |        |
| Untreated                               | PC-3     | 1.21 (0.78-1.74)       | 42  | 0.374 | 0.433  | 0.007  | <0.001 |
| Zinc                                    | PC-3     | 1.65 (1.35-2.06)       | 23  | 0.500 |        | 0.483  | 0.009  |
| Cisplatin                               | PC-3     | 1.98 (1.72-2.75)       | 27  | 0.500 |        |        | 0.432  |
| Docetaxel                               | PC-3     | 2.88 (1.42-4.63)       | 83  | 0.009 |        |        |        |
| Untreated                               | together | 1.11 (0.62-1.46)       | 126 | 0.030 | 0.961  | <0.001 | <0.001 |
| Zinc                                    | together | 1.12 (0.71-1.52)       | 69  | 0.127 |        | <0.001 | <0.001 |

|                                    |           |          |                    |     |       |        |       |        |
|------------------------------------|-----------|----------|--------------------|-----|-------|--------|-------|--------|
|                                    | Cisplatin | together | 1.80 (1.21-2.43)   | 152 | 0.123 |        |       | <0.001 |
|                                    | Docetaxel | together | 2.70 (1.55-4.65)   | 170 | 0.001 |        |       |        |
| Setpoint height ( $\mu\text{m}$ )* |           |          |                    |     |       |        |       |        |
|                                    | Untreated | PNT1A    | 11.03 (8.73-13.26) | 64  | 0.001 | <0.001 | 0.048 | 0.040  |
|                                    | Zinc      | PNT1A    | 6.67 (3.71-9.37)   | 23  | 0.033 |        | 0.001 | 0.003  |
|                                    | Cisplatin | PNT1A    | 9.57 (7.95-11.28)  | 84  | 0.022 |        |       | 0.993  |
|                                    | Docetaxel | PNT1A    | 9.32 (8.33-10.89)  | 61  | 0.486 |        |       |        |
|                                    | Untreated | 22Rv1    | 9.89 (7.48-11.61)  | 20  | 0.026 | 0.709  | 0.799 | 0.087  |
|                                    | Zinc      | 22Rv1    | 8.95 (6.98-10.24)  | 23  | 0.134 |        | 0.991 | 0.563  |
|                                    | Cisplatin | 22Rv1    | 9.54 (5.96-12.01)  | 41  | 0.053 |        |       | 0.275  |
|                                    | Docetaxel | 22Rv1    | 8.54 (5.47-9.92)   | 26  | 0.083 |        |       |        |
|                                    | Untreated | PC-3     | 7.52 (5.80-9.54)   | 42  | 0.237 | 0.784  | 0.895 | 0.503  |
|                                    | Zinc      | PC-3     | 6.38 (5.24-9.20)   | 23  | 0.019 |        | 0.995 | 0.136  |
|                                    | Cisplatin | PC-3     | 8.29 (5.57-8.91)   | 27  | 0.002 |        |       | 0.196  |
|                                    | Docetaxel | PC-3     | 8.43 (6.44-10.13)  | 83  | 0.377 |        |       |        |
|                                    | Untreated | all      | 9.56 (7.33-12.39)  | 126 | 0.018 | <0.001 | 0.680 | 0.092  |
|                                    | Zinc      | all      | 7.32 (5.49-9.65)   | 69  | 0.062 |        | 0.002 | 0.038  |
|                                    | Cisplatin | all      | 8.96 (7.58-11.16)  | 152 | 0.132 |        |       | 0.597  |
|                                    | Docetaxel | all      | 8.85 (6.79-10.42)  | 170 | 0.018 |        |       |        |

KW, Kruskal-Wallis test, Lilliefors test used for normality analysis. \* indicate Kruskal-Wallis test used instead of ANOVA for this comparison. † for colony-forming analysis, N reflect number of chamber wells instead of number of analyzed cells as in other analyses.

**Figure S1: Confocal microscopy of cell lines exposed to cisplatin, docetaxel and zinc.** Max intensity projections of representative cells. Scalebar represents 20  $\mu\text{m}$ .

Actin/Tubulin/Hoechst 33342

PNT1A

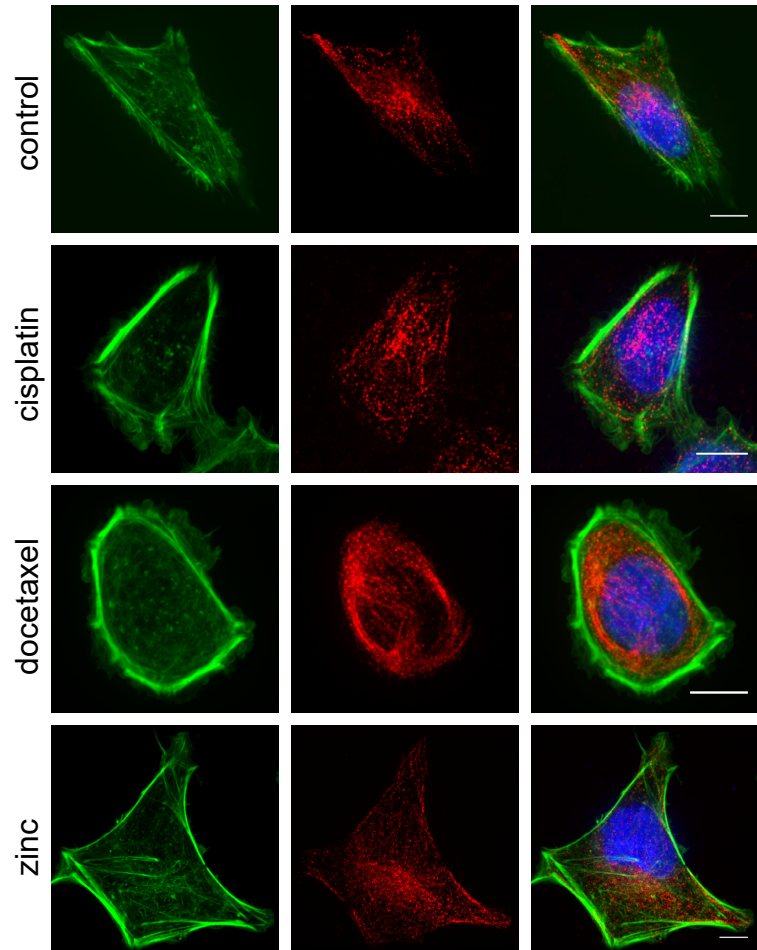

22Rv1

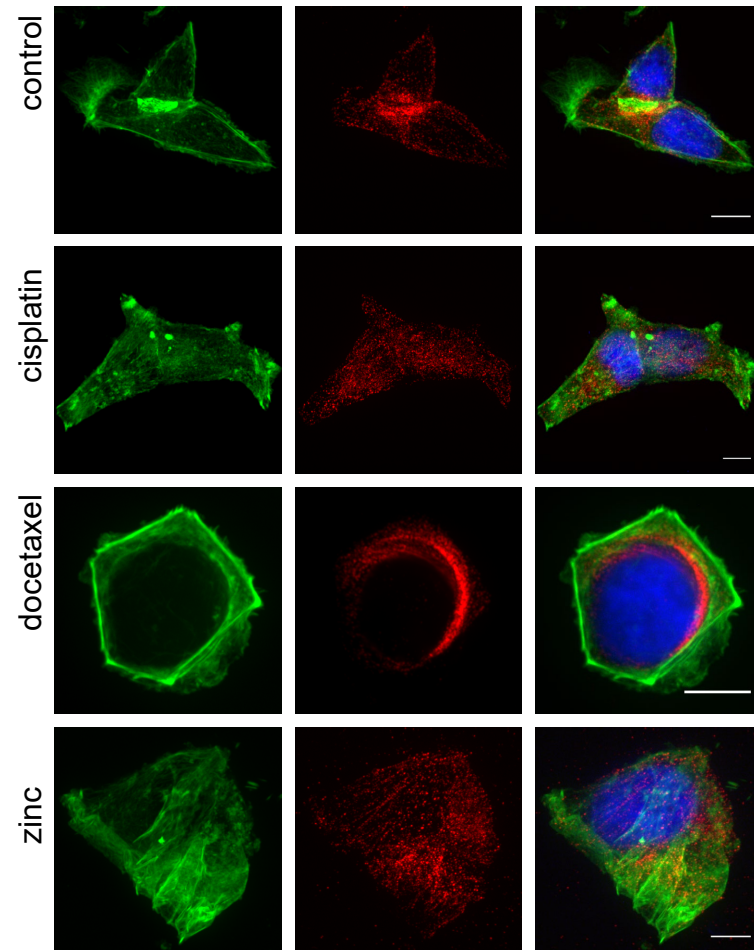

PC-3

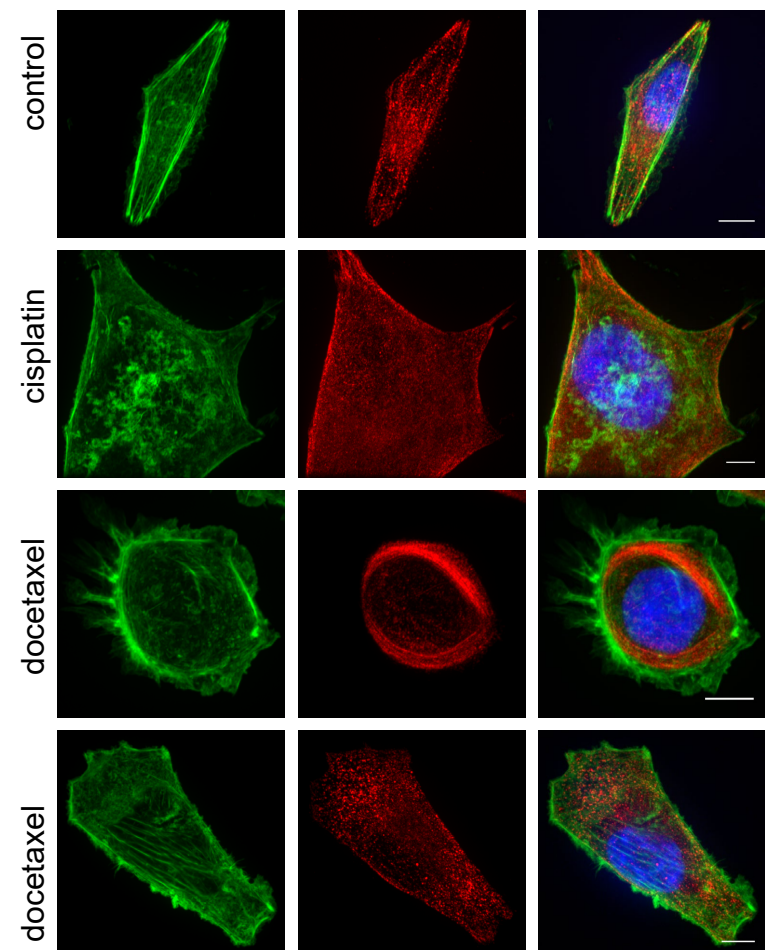

Figure S1: Confocal microscopy of cell lines exposed to cisplatin, docetaxel and zinc. Max intensity projections of representative cells. Scalebar represents 20  $\mu\text{m}$ .

**Table S2: Changes of actin and tubulin, analysis of confocal microscopy.** Results of linear model of actin and tubulin staining for following cellular regions: whole cell, cell periphery (defined by a range 4  $\mu\text{m}$  from the cell border), and fibers. SD of angle, standard deviation of actin fiber angles standardized to the mean angle. For description of measured factors, see Methods section of article. “Estimate” shown as relative change compared to intercept – control, untreated cells.

| Cell line | structure  | substructure | factor                                  | level     | Estimate | Std. Error | Pr(> t ) |
|-----------|------------|--------------|-----------------------------------------|-----------|----------|------------|----------|
| all       | actin      | cell         | Integrated density                      | control   | 894145.0 | 121694.0   | 0.000    |
| all       | actin      | cell         | Integrated density                      | cisplatin | 417669.0 | 156832.0   | 0.008    |
| all       | actin      | cell         | Integrated density                      | docetaxel | 109809.0 | 149208.0   | 0.462    |
| all       | actin      | cell         | Integrated density                      | Zn        | 169941.0 | 156832.0   | 0.279    |
| all       | actin      | cell         | Median intensity                        | control   | 289.1    | 14.5       | < 2e-16  |
| all       | actin      | cell         | Median intensity                        | cisplatin | 4.0      | 18.7       | 0.829    |
| all       | actin      | cell         | Median intensity                        | docetaxel | 50.4     | 17.8       | 0.005    |
| all       | actin      | cell         | Median intensity                        | Zn        | -1.6     | 18.7       | 0.932    |
| all       | actin      | fibers       | Number of fibers                        | control   | 2.0      | 0.3        | 0.000    |
| all       | actin      | fibers       | Number of fibers                        | cisplatin | 2.0      | 0.4        | 0.000    |
| all       | actin      | fibers       | Number of fibers                        | docetaxel | -0.4     | 0.4        | 0.240    |
| all       | actin      | fibers       | Number of fibers                        | Zn        | 0.4      | 0.4        | 0.358    |
| all       | actin      | fibers       | SD of angle                             | control   | 21.3     | 2.7        | 0.000    |
| all       | actin      | fibers       | SD of angle                             | cisplatin | 2.9      | 3.1        | 0.365    |
| all       | actin      | fibers       | SD of angle                             | docetaxel | 0.3      | 3.2        | 0.917    |
| all       | actin      | fibers       | SD of angle                             | Zn        | -0.9     | 3.2        | 0.776    |
| all       | actin      | fibers       | Fiber lenght ( $\mu\text{m}$ )          | control   | 4.7      | 0.5        | < 2e-16  |
| all       | actin      | fibers       | Fiber lenght ( $\mu\text{m}$ )          | cisplatin | 1.9      | 0.6        | 0.002    |
| all       | actin      | fibers       | Fiber lenght ( $\mu\text{m}$ )          | docetaxel | 3.3      | 0.6        | 0.000    |
| all       | actin      | fibers       | Fiber lenght ( $\mu\text{m}$ )          | Zn        | 3.5      | 0.6        | 0.000    |
| all       | actin      | fibers       | Integrated density                      | control   | 732.1    | 130.5      | 0.000    |
| all       | actin      | fibers       | Integrated density                      | cisplatin | 358.5    | 159.8      | 0.026    |
| all       | actin      | fibers       | Integrated density                      | docetaxel | 919.9    | 159.5      | 0.000    |
| all       | actin      | fibers       | Integrated density                      | Zn        | 635.2    | 161.5      | 0.000    |
| all       | actin      | fibers       | Mean intensity                          | control   | 400.4    | 29.5       | < 2e-16  |
| all       | actin      | fibers       | Mean intensity                          | cisplatin | 25.4     | 36.1       | 0.482    |
| all       | actin      | fibers       | Mean intensity                          | docetaxel | 121.1    | 36.0       | 0.001    |
| all       | actin      | fibers       | Mean intensity                          | Zn        | 21.0     | 36.5       | 0.565    |
| all       | actin      | periphery    | Integrated density                      | control   | 596532.0 | 51021.0    | < 2e-16  |
| all       | actin      | periphery    | Integrated density                      | cisplatin | 228582.0 | 65753.0    | 0.001    |
| all       | actin      | periphery    | Integrated density                      | docetaxel | 100667.0 | 62557.0    | 0.108    |
| all       | actin      | periphery    | Integrated density                      | Zn        | 92588.0  | 65753.0    | 0.160    |
| all       | actin      | periphery    | Median intensity                        | control   | 305.2    | 16.6       | < 2e-16  |
| all       | actin      | periphery    | Median intensity                        | cisplatin | 11.4     | 21.3       | 0.593    |
| all       | actin      | periphery    | Median intensity                        | docetaxel | 69.2     | 20.3       | 0.001    |
| all       | actin      | periphery    | Median intensity                        | Zn        | 5.5      | 21.3       | 0.796    |
| all       | actin      | periphery    | Periphery/cell integrated density ratio | control   | 0.8      | 0.0        | < 2e-16  |
| all       | actin      | periphery    | Periphery/cell integrated density ratio | cisplatin | -0.1     | 0.0        | 0.002    |
| all       | actin      | periphery    | Periphery/cell integrated density ratio | docetaxel | 0.0      | 0.0        | 0.192    |
| all       | actin      | periphery    | Periphery/cell integrated density ratio | Zn        | 0.0      | 0.0        | 0.100    |
| all       | morphology | cell         | Aspect ratio                            | control   | 2.1      | 0.1        | <2e-16   |
| all       | morphology | cell         | Aspect ratio                            | cisplatin | 0.2      | 0.1        | 0.275    |

|              |            |           |                                         |           |           |          |         |
|--------------|------------|-----------|-----------------------------------------|-----------|-----------|----------|---------|
| <b>all</b>   | morphology | cell      | Aspect ratio                            | docetaxel | -0.2      | 0.1      | 0.170   |
| <b>all</b>   | morphology | cell      | Aspect ratio                            | Zn        | 0.1       | 0.1      | 0.695   |
| <b>all</b>   | morphology | cell      | Cell area ( $\mu\text{m}^2$ )           | control   | 462.4     | 54.4     | 0.000   |
| <b>all</b>   | morphology | cell      | Cell area ( $\mu\text{m}^2$ )           | cisplatin | 189.8     | 70.1     | 0.007   |
| <b>all</b>   | morphology | cell      | Cell area ( $\mu\text{m}^2$ )           | docetaxel | -35.1     | 66.7     | 0.599   |
| <b>all</b>   | morphology | cell      | Cell area ( $\mu\text{m}^2$ )           | Zn        | 48.6      | 70.1     | 0.489   |
| <b>all</b>   | morphology | cell      | Maximum caliper ( $\mu\text{m}$ )       | control   | 13.7      | 0.7      | < 2e-16 |
| <b>all</b>   | morphology | cell      | Maximum caliper ( $\mu\text{m}$ )       | cisplatin | 3.4       | 0.9      | 0.000   |
| <b>all</b>   | morphology | cell      | Maximum caliper ( $\mu\text{m}$ )       | docetaxel | -0.7      | 0.8      | 0.392   |
| <b>all</b>   | morphology | cell      | Maximum caliper ( $\mu\text{m}$ )       | Zn        | 1.2       | 0.9      | 0.165   |
| <b>all</b>   | morphology | cell      | Roundness                               | control   | 0.6       | 0.0      | <2e-16  |
| <b>all</b>   | morphology | cell      | Roundness                               | cisplatin | 0.0       | 0.0      | 0.183   |
| <b>all</b>   | morphology | cell      | Roundness                               | docetaxel | 0.0       | 0.0      | 0.107   |
| <b>all</b>   | morphology | cell      | Roundness                               | Zn        | 0.0       | 0.0      | 0.917   |
| <b>all</b>   | tubulin    | cell      | Integrated density                      | control   | 623027.0  | 80495.0  | 0.000   |
| <b>all</b>   | tubulin    | cell      | Integrated density                      | cisplatin | 29510.0   | 103738.0 | 0.776   |
| <b>all</b>   | tubulin    | cell      | Integrated density                      | docetaxel | 110807.0  | 98695.0  | 0.262   |
| <b>all</b>   | tubulin    | cell      | Integrated density                      | Zn        | 25846.0   | 103738.0 | 0.803   |
| <b>all</b>   | tubulin    | cell      | Median intensity                        | control   | 178.8     | 10.7     | < 2e-16 |
| <b>all</b>   | tubulin    | cell      | Median intensity                        | cisplatin | -32.8     | 13.8     | 0.018   |
| <b>all</b>   | tubulin    | cell      | Median intensity                        | docetaxel | 69.8      | 13.1     | 0.000   |
| <b>all</b>   | tubulin    | cell      | Median intensity                        | Zn        | 3.3       | 13.8     | 0.812   |
| <b>all</b>   | tubulin    | periphery | Integrated density                      | control   | 352467.0  | 26859.0  | < 2e-16 |
| <b>all</b>   | tubulin    | periphery | Integrated density                      | cisplatin | 5896.0    | 34615.0  | 0.865   |
| <b>all</b>   | tubulin    | periphery | Integrated density                      | docetaxel | 100400.0  | 32932.0  | 0.002   |
| <b>all</b>   | tubulin    | periphery | Integrated density                      | Zn        | 28983.0   | 34615.0  | 0.403   |
| <b>all</b>   | tubulin    | periphery | Median intensity                        | control   | 174.8     | 11.5     | < 2e-16 |
| <b>all</b>   | tubulin    | periphery | Median intensity                        | cisplatin | -30.6     | 14.8     | 0.039   |
| <b>all</b>   | tubulin    | periphery | Median intensity                        | docetaxel | 75.0      | 14.1     | 0.000   |
| <b>all</b>   | tubulin    | periphery | Median intensity                        | Zn        | 2.8       | 14.8     | 0.850   |
| <b>all</b>   | tubulin    | periphery | Periphery/cell integrated density ratio | control   | 0.8       | 0.0      | < 2e-16 |
| <b>all</b>   | tubulin    | periphery | Periphery/cell integrated density ratio | cisplatin | -0.1      | 0.0      | 0.002   |
| <b>all</b>   | tubulin    | periphery | Periphery/cell integrated density ratio | docetaxel | 0.0       | 0.0      | 0.174   |
| <b>all</b>   | tubulin    | periphery | Periphery/cell integrated density ratio | Zn        | 0.0       | 0.0      | 0.064   |
| <b>22Rv1</b> | actin      | cell      | Integrated density                      | control   | 192318.0  | 131008.0 | 0.145   |
| <b>22Rv1</b> | actin      | cell      | Integrated density                      | cisplatin | 1307564.0 | 178279.0 | 0.000   |
| <b>22Rv1</b> | actin      | cell      | Integrated density                      | docetaxel | 355896.0  | 157336.0 | 0.025   |
| <b>22Rv1</b> | actin      | cell      | Integrated density                      | Zn        | 310299.0  | 167715.0 | 0.067   |
| <b>22Rv1</b> | actin      | cell      | Median intensity                        | control   | 149.8     | 20.9     | 0.000   |
| <b>22Rv1</b> | actin      | cell      | Median intensity                        | cisplatin | 168.0     | 28.4     | 0.000   |
| <b>22Rv1</b> | actin      | cell      | Median intensity                        | docetaxel | 76.1      | 25.1     | 0.003   |
| <b>22Rv1</b> | actin      | cell      | Median intensity                        | Zn        | 73.0      | 26.7     | 0.007   |
| <b>22RV1</b> | actin      | fibers    | Number of fibers                        | control   | 0.3       | 0.4      | 0.450   |
| <b>22RV1</b> | actin      | fibers    | Number of fibers                        | cisplatin | 2.3       | 0.5      | 0.000   |
| <b>22RV1</b> | actin      | fibers    | Number of fibers                        | docetaxel | 0.5       | 0.4      | 0.282   |
| <b>22RV1</b> | actin      | fibers    | Number of fibers                        | Zn        | 1.1       | 0.5      | 0.019   |
| <b>22Rv1</b> | actin      | fibers    | SD of angle                             | control   | 41.0      | 16.3     | 0.016   |
| <b>22Rv1</b> | actin      | fibers    | SD of angle                             | cisplatin | -11.5     | 16.9     | 0.500   |



|       |            |           |                                         |           |          |          |         |
|-------|------------|-----------|-----------------------------------------|-----------|----------|----------|---------|
| 22Rv1 | actin      | fibers    | SD of angle                             | docetaxel | -12.7    | 17.0     | 0.460   |
| 22Rv1 | actin      | fibers    | SD of angle                             | Zn        | -15.0    | 17.0     | 0.383   |
| 22Rv1 | actin      | fibers    | Fiber length ( $\mu\text{m}$ )          | control   | 4.8      | 1.2      | 0.000   |
| 22Rv1 | actin      | fibers    | Fiber length ( $\mu\text{m}$ )          | cisplatin | 0.2      | 1.3      | 0.856   |
| 22Rv1 | actin      | fibers    | Fiber length ( $\mu\text{m}$ )          | docetaxel | 3.6      | 1.3      | 0.008   |
| 22Rv1 | actin      | fibers    | Fiber length ( $\mu\text{m}$ )          | Zn        | 1.1      | 1.3      | 0.407   |
| 22Rv1 | actin      | fibers    | Integrated density                      | control   | 326.7    | 307.6    | 0.293   |
| 22Rv1 | actin      | fibers    | Integrated density                      | cisplatin | 887.4    | 350.0    | 0.014   |
| 22Rv1 | actin      | fibers    | Integrated density                      | docetaxel | 739.2    | 350.0    | 0.040   |
| 22Rv1 | actin      | fibers    | Integrated density                      | Zn        | 588.6    | 350.0    | 0.099   |
| 22Rv1 | actin      | fibers    | Mean intensity                          | control   | 192.8    | 96.0     | 0.050   |
| 22Rv1 | actin      | fibers    | Mean intensity                          | cisplatin | 382.1    | 109.2    | 0.001   |
| 22Rv1 | actin      | fibers    | Mean intensity                          | docetaxel | 113.7    | 109.2    | 0.302   |
| 22Rv1 | actin      | fibers    | Mean intensity                          | Zn        | 184.2    | 109.2    | 0.097   |
| 22Rv1 | actin      | periphery | Integrated density                      | control   | 182771.0 | 74559.0  | 0.016   |
| 22Rv1 | actin      | periphery | Integrated density                      | cisplatin | 768006.0 | 101462.0 | 0.000   |
| 22Rv1 | actin      | periphery | Integrated density                      | docetaxel | 211428.0 | 89542.0  | 0.020   |
| 22Rv1 | actin      | periphery | Integrated density                      | Zn        | 182966.0 | 95450.0  | 0.057   |
| 22Rv1 | actin      | periphery | Median intensity                        | control   | 152.6    | 21.0     | 0.000   |
| 22Rv1 | actin      | periphery | Median intensity                        | cisplatin | 184.1    | 28.5     | 0.000   |
| 22Rv1 | actin      | periphery | Median intensity                        | docetaxel | 81.6     | 25.2     | 0.002   |
| 22Rv1 | actin      | periphery | Median intensity                        | Zn        | 73.8     | 26.8     | 0.007   |
| 22Rv1 | actin      | periphery | Periphery/cell integrated density ratio | control   | 1.0      | 0.0      | < 2e-16 |
| 22Rv1 | actin      | periphery | Periphery/cell integrated density ratio | cisplatin | -0.2     | 0.0      | 0.000   |
| 22Rv1 | actin      | periphery | Periphery/cell integrated density ratio | docetaxel | -0.2     | 0.0      | 0.000   |
| 22Rv1 | actin      | periphery | Periphery/cell integrated density ratio | Zn        | -0.1     | 0.0      | 0.000   |
| 22Rv1 | morphology | cell      | Aspect ratio                            | control   | 2.2      | 0.2      | <2e-16  |
| 22Rv1 | morphology | cell      | Aspect ratio                            | cisplatin | -0.1     | 0.3      | 0.639   |
| 22Rv1 | morphology | cell      | Aspect ratio                            | docetaxel | -0.3     | 0.2      | 0.172   |
| 22Rv1 | morphology | cell      | Aspect ratio                            | Zn        | -0.3     | 0.2      | 0.150   |
| 22Rv1 | morphology | cell      | Cell area ( $\mu\text{m}^2$ )           | control   | 178.9    | 69.5     | 0.011   |
| 22Rv1 | morphology | cell      | Cell area ( $\mu\text{m}^2$ )           | cisplatin | 519.9    | 94.6     | 0.000   |
| 22Rv1 | morphology | cell      | Cell area ( $\mu\text{m}^2$ )           | docetaxel | 196.9    | 83.4     | 0.020   |
| 22Rv1 | morphology | cell      | Cell area ( $\mu\text{m}^2$ )           | Zn        | 164.8    | 88.9     | 0.066   |
| 22Rv1 | morphology | cell      | Maximum caliper ( $\mu\text{m}$ )       | control   | 9.9      | 1.1      | 0.000   |
| 22Rv1 | morphology | cell      | Maximum caliper ( $\mu\text{m}$ )       | cisplatin | 7.9      | 1.5      | 0.000   |
| 22Rv1 | morphology | cell      | Maximum caliper ( $\mu\text{m}$ )       | docetaxel | 2.6      | 1.3      | 0.047   |
| 22Rv1 | morphology | cell      | Maximum caliper ( $\mu\text{m}$ )       | Zn        | 1.6      | 1.4      | 0.239   |
| 22Rv1 | morphology | cell      | Roundness                               | control   | 0.5      | 0.0      | <2e-16  |
| 22Rv1 | morphology | cell      | Roundness                               | cisplatin | 0.0      | 0.1      | 0.538   |
| 22Rv1 | morphology | cell      | Roundness                               | docetaxel | 0.1      | 0.1      | 0.042   |
| 22Rv1 | morphology | cell      | Roundness                               | Zn        | 0.1      | 0.1      | 0.118   |
| 22Rv1 | tubulin    | cell      | Integrated density                      | control   | 126047.0 | 59525.0  | 0.036   |
| 22Rv1 | tubulin    | cell      | Integrated density                      | cisplatin | 419973.0 | 81003.0  | 0.000   |
| 22Rv1 | tubulin    | cell      | Integrated density                      | docetaxel | 321173.0 | 71487.0  | 0.000   |
| 22Rv1 | tubulin    | cell      | Integrated density                      | Zn        | 244625.0 | 76203.0  | 0.002   |
| 22Rv1 | tubulin    | cell      | Median intensity                        | control   | 111.3    | 13.3     | 0.000   |
| 22Rv1 | tubulin    | cell      | Median intensity                        | cisplatin | 8.6      | 18.1     | 0.635   |

|              |         |           |                                         |             |           |          |         |
|--------------|---------|-----------|-----------------------------------------|-------------|-----------|----------|---------|
| <b>22Rv1</b> | tubulin | cell      | Median intensity                        | docetaxel   | 71.3      | 16.0     | 0.000   |
| <b>22Rv1</b> | tubulin | cell      | Median intensity                        | Zn          | 50.0      | 17.0     | 0.004   |
| <b>22Rv1</b> | tubulin | periphery | Integrated density                      | control     | 117907.0  | 25984.0  | 0.000   |
| <b>22Rv1</b> | tubulin | periphery | Integrated density                      | cisplatin   | 190527.0  | 35359.0  | 0.000   |
| <b>22Rv1</b> | tubulin | periphery | Integrated density                      | docetaxel   | 197143.0  | 31206.0  | 0.000   |
| <b>22Rv1</b> | tubulin | periphery | Integrated density                      | Zn          | 139005.0  | 33264.0  | 0.000   |
| <b>22Rv1</b> | tubulin | periphery | Median intensity                        | control     | 111.4     | 13.0     | 0.000   |
| <b>22Rv1</b> | tubulin | periphery | Median intensity                        | cisplatin   | 8.4       | 17.7     | 0.634   |
| <b>22Rv1</b> | tubulin | periphery | Median intensity                        | docetaxel   | 69.2      | 15.6     | 0.000   |
| <b>22Rv1</b> | tubulin | periphery | Median intensity                        | Zn          | 47.7      | 16.6     | 0.005   |
| <b>22Rv1</b> | tubulin | periphery | Periphery/cell integrated density ratio | control     | 0.9       | 0.0      | < 2e-16 |
| <b>22Rv1</b> | tubulin | periphery | Periphery/cell integrated density ratio | cisplatin   | -0.3      | 0.0      | 0.000   |
| <b>22Rv1</b> | tubulin | periphery | Periphery/cell integrated density ratio | docetaxel   | -0.2      | 0.0      | 0.000   |
| <b>22Rv1</b> | tubulin | periphery | Periphery/cell integrated density ratio | Zn          | -0.1      | 0.0      | 0.001   |
| <b>PC-3</b>  | actin   | cell      | Integrated density                      | control     | 1490356.0 | 368906.0 | 0.000   |
| <b>PC-3</b>  | actin   | cell      | Integrated density                      | cisplatin   | 909408.0  | 528193.0 | 0.088   |
| <b>PC-3</b>  | actin   | cell      | Integrated density                      | docetaxel   | 44589.0   | 459674.0 | 0.923   |
| <b>PC-3</b>  | actin   | cell      | Integrated density                      | Zn          | 603765.0  | 505145.0 | 0.235   |
| <b>PC-3</b>  | actin   | cell      | Median intensity                        | control     | 307.3     | 29.2     | < 2e-16 |
| <b>PC-3</b>  | actin   | cell      | Median intensity                        | cisplatin   | -17.8     | 41.8     | 0.670   |
| <b>PC-3</b>  | actin   | cell      | Median intensity                        | docetaxel   | 141.7     | 36.4     | 0.000   |
| <b>PC-3</b>  | actin   | cell      | Median intensity                        | Zn          | 72.1      | 40.0     | 0.074   |
| <b>PC-3</b>  | actin   | fibers    | Number of fibers                        | control     | 2.8       | 0.6      | 0.000   |
| <b>PC-3</b>  | actin   | fibers    | Number of fibers                        | cisplatin   | -0.1      | 0.9      | 0.870   |
| <b>PC-3</b>  | actin   | fibers    | Number of fibers                        | docetaxel   | -0.8      | 0.8      | 0.290   |
| <b>PC-3</b>  | actin   | fibers    | Number of fibers                        | Zn          | -0.8      | 0.8      | 0.318   |
| <b>PC-3</b>  | actin   | fibers    | SD of angle                             | control     | 19.8      | 4.5      | 0.000   |
| <b>PC-3</b>  | actin   | fibers    | SD of angle                             | cisplatin   | 8.7       | 6.6      | 0.193   |
| <b>PC-3</b>  | actin   | fibers    | SD of angle                             | docetaxel   | 7.9       | 6.1      | 0.196   |
| <b>PC-3</b>  | actin   | fibers    | SD of angle                             | Zn          | 9.2       | 6.8      | 0.182   |
| <b>PC-3</b>  | actin   | fibers    | Fiber lenght (µm)                       | control     | 4.7       | 0.4      | 0.000   |
| <b>PC-3</b>  | actin   | fibers    | Fiber lenght (µm)                       | cisplatin   | 0.0       | 0.6      | 0.992   |
| <b>PC-3</b>  | actin   | fibers    | Fiber lenght (µm)                       | docetaxel - | 0.0       | 0.6      | 0.991   |
| <b>PC-3</b>  | actin   | fibers    | Fiber lenght (µm)                       | Zn          | 1.0       | 0.6      | 0.126   |
| <b>PC-3</b>  | actin   | fibers    | Integrated density                      | control     | 716.1     | 124.5    | 0.000   |
| <b>PC-3</b>  | actin   | fibers    | Integrated density                      | cisplatin   | 104.3     | 182.3    | 0.569   |
| <b>PC-3</b>  | actin   | fibers    | Integrated density                      | docetaxel   | 322.9     | 160.8    | 0.049   |
| <b>PC-3</b>  | actin   | fibers    | Integrated density                      | Zn          | 379.8     | 182.3    | 0.041   |
| <b>PC-3</b>  | actin   | fibers    | Mean intensity                          | control     | 388.3     | 50.2     | 0.000   |
| <b>PC-3</b>  | actin   | fibers    | Mean intensity                          | cisplatin   | 61.1      | 73.5     | 0.409   |
| <b>PC-3</b>  | actin   | fibers    | Mean intensity                          | docetaxel   | 155.6     | 64.8     | 0.019   |
| <b>PC-3</b>  | actin   | fibers    | Mean intensity                          | Zn          | 101.7     | 73.5     | 0.171   |
| <b>PC-3</b>  | actin   | periphery | Integrated density                      | control     | 791526.0  | 110027.0 | 0.000   |
| <b>PC-3</b>  | actin   | periphery | Integrated density                      | cisplatin   | 284031.0  | 157535.0 | 0.074   |
| <b>PC-3</b>  | actin   | periphery | Integrated density                      | docetaxel   | 144596.0  | 137099.0 | 0.294   |
| <b>PC-3</b>  | actin   | periphery | Integrated density                      | Zn          | 291084.0  | 150661.0 | 0.056   |
| <b>PC-3</b>  | actin   | periphery | Median intensity                        | control     | 329.4     | 32.0     | < 2e-16 |
| <b>PC-3</b>  | actin   | periphery | Median intensity                        | cisplatin   | -9.8      | 45.9     | 0.831   |

|       |            |           |                                         |           |           |          |         |
|-------|------------|-----------|-----------------------------------------|-----------|-----------|----------|---------|
| PC-3  | actin      | periphery | Median intensity                        | docetaxel | 196.8     | 39.9     | 0.000   |
| PC-3  | actin      | periphery | Median intensity                        | Zn        | 101.9     | 43.9     | 0.022   |
| PC-3  | actin      | periphery | Periphery/cell integrated density ratio | control   | 0.6       | 0.0      | <2e-16  |
| PC-3  | actin      | periphery | Periphery/cell integrated density ratio | cisplatin | -0.1      | 0.1      | 0.014   |
| PC-3  | actin      | periphery | Periphery/cell integrated density ratio | docetaxel | 0.1       | 0.0      | 0.046   |
| PC-3  | actin      | periphery | Periphery/cell integrated density ratio | Zn        | 0.0       | 0.0      | 0.793   |
| PC-3  | morphology | cell      | Aspect ratio                            | control   | 2.0       | 0.2      | < 2e-16 |
| PC-3  | morphology | cell      | Aspect ratio                            | cisplatin | -0.2      | 0.3      | 0.548   |
| PC-3  | morphology | cell      | Aspect ratio                            | docetaxel | -0.6      | 0.2      | 0.006   |
| PC-3  | morphology | cell      | Aspect ratio                            | Zn        | -0.4      | 0.2      | 0.099   |
| PC-3  | morphology | cell      | Cell area (µm <sup>2</sup> )            | control   | 866.7     | 160.4    | 0.000   |
| PC-3  | morphology | cell      | Cell area (µm <sup>2</sup> )            | cisplatin | 439.0     | 229.7    | 0.059   |
| PC-3  | morphology | cell      | Cell area (µm <sup>2</sup> )            | docetaxel | -358.5    | 199.9    | 0.076   |
| PC-3  | morphology | cell      | Cell area (µm <sup>2</sup> )            | Zn        | -7.1      | 219.7    | 0.974   |
| PC-3  | morphology | cell      | Maximum caliper (µm)                    | control   | 17.7      | 1.3      | < 2e-16 |
| PC-3  | morphology | cell      | Maximum caliper (µm)                    | cisplatin | 4.0       | 1.9      | 0.039   |
| PC-3  | morphology | cell      | Maximum caliper (µm)                    | docetaxel | -5.8      | 1.7      | 0.001   |
| PC-3  | morphology | cell      | Maximum caliper (µm)                    | Zn        | -1.4      | 1.8      | 0.437   |
| PC-3  | morphology | cell      | Roundness                               | control   | 0.6       | 0.0      | < 2e-16 |
| PC-3  | morphology | cell      | Roundness                               | cisplatin | 0.0       | 0.1      | 0.786   |
| PC-3  | morphology | cell      | Roundness                               | docetaxel | 0.1       | 0.0      | 0.008   |
| PC-3  | morphology | cell      | Roundness                               | Zn        | 0.1       | 0.1      | 0.168   |
| PC-3  | tubulin    | cell      | Integrated density                      | control   | 1220513.0 | 245560.0 | 0.000   |
| PC-3  | tubulin    | cell      | Integrated density                      | cisplatin | 306931.0  | 351588.0 | 0.385   |
| PC-3  | tubulin    | cell      | Integrated density                      | docetaxel | 178744.0  | 305979.0 | 0.560   |
| PC-3  | tubulin    | cell      | Integrated density                      | Zn        | 7317.0    | 336246.0 | 0.983   |
| PC-3  | tubulin    | cell      | Median intensity                        | control   | 208.2     | 29.8     | 0.000   |
| PC-3  | tubulin    | cell      | Median intensity                        | cisplatin | -18.3     | 42.6     | 0.668   |
| PC-3  | tubulin    | cell      | Median intensity                        | docetaxel | 202.5     | 37.1     | 0.000   |
| PC-3  | tubulin    | cell      | Median intensity                        | Zn        | 21.8      | 40.8     | 0.594   |
| PC-3  | tubulin    | periphery | Integrated density                      | control   | 551481.0  | 60615.0  | 0.000   |
| PC-3  | tubulin    | periphery | Integrated density                      | cisplatin | 68363.0   | 86788.0  | 0.433   |
| PC-3  | tubulin    | periphery | Integrated density                      | docetaxel | 188511.0  | 75530.0  | 0.014   |
| PC-3  | tubulin    | periphery | Integrated density                      | Zn        | 21700.0   | 83001.0  | 0.794   |
| PC-3  | tubulin    | periphery | Median intensity                        | control   | 208.2     | 29.8     | 0.000   |
| PC-3  | tubulin    | periphery | Median intensity                        | cisplatin | -18.3     | 42.6     | 0.668   |
| PC-3  | tubulin    | periphery | Median intensity                        | docetaxel | 202.5     | 37.1     | 0.000   |
| PC-3  | tubulin    | periphery | Median intensity                        | Zn        | 21.8      | 40.8     | 0.594   |
| PC-3  | tubulin    | periphery | Periphery/cell integrated density ratio | control   | 0.6       | 0.0      | <2e-16  |
| PC-3  | tubulin    | periphery | Periphery/cell integrated density ratio | cisplatin | -0.1      | 0.1      | 0.040   |
| PC-3  | tubulin    | periphery | Periphery/cell integrated density ratio | docetaxel | 0.0       | 0.1      | 0.386   |
| PC-3  | tubulin    | periphery | Periphery/cell integrated density ratio | Zn        | 0.0       | 0.1      | 0.519   |
| PNT1A | actin      | cell      | Integrated density                      | control   | 1007319.0 | 94594.0  | <2e-16  |
| PNT1A | actin      | cell      | Integrated density                      | cisplatin | -90165.0  | 114712.0 | 0.433   |
| PNT1A | actin      | cell      | Integrated density                      | docetaxel | 54353.0   | 116799.0 | 0.642   |
| PNT1A | actin      | cell      | Integrated density                      | Zn        | -25196.0  | 118971.0 | 0.832   |
| PNT1A | actin      | cell      | Median intensity                        | control   | 399.1     | 19.4     | < 2e-16 |
| PNT1A | actin      | cell      | Median intensity                        | cisplatin | -91.3     | 23.6     | 0.000   |

|       |            |           |                                         |           |          |         |         |
|-------|------------|-----------|-----------------------------------------|-----------|----------|---------|---------|
| PNT1A | actin      | cell      | Median intensity                        | docetaxel | 0.5      | 24.0    | 0.984   |
| PNT1A | actin      | cell      | Median intensity                        | Zn        | -85.7    | 24.4    | 0.001   |
| PNT1A | actin      | fibers    | Number of fibers                        | control   | 2.7      | 0.5     | 0.000   |
| PNT1A | actin      | fibers    | Number of fibers                        | cisplatin | 2.4      | 0.6     | 0.000   |
| PNT1A | actin      | fibers    | Number of fibers                        | docetaxel | -0.6     | 0.6     | 0.294   |
| PNT1A | actin      | fibers    | Number of fibers                        | Zn        | 0.5      | 0.6     | 0.388   |
| PNT1A | actin      | fibers    | SD of angle                             | control   | 21.1     | 3.1     | 0.000   |
| PNT1A | actin      | fibers    | SD of angle                             | cisplatin | 0.6      | 3.6     | 0.877   |
| PNT1A | actin      | fibers    | SD of angle                             | docetaxel | -4.4     | 3.8     | 0.247   |
| PNT1A | actin      | fibers    | SD of angle                             | Zn        | -4.0     | 3.6     | 0.275   |
| PNT1A | actin      | fibers    | Fiber length ( $\mu\text{m}$ )          | control   | 4.6      | 0.7     | 0.000   |
| PNT1A | actin      | fibers    | Fiber length ( $\mu\text{m}$ )          | cisplatin | 3.0      | 0.8     | 0.000   |
| PNT1A | actin      | fibers    | Fiber length ( $\mu\text{m}$ )          | docetaxel | 4.9      | 0.8     | 0.000   |
| PNT1A | actin      | fibers    | Fiber length ( $\mu\text{m}$ )          | Zn        | 5.0      | 0.8     | 0.000   |
| PNT1A | actin      | fibers    | Integrated density                      | control   | 840.8    | 192.2   | 0.000   |
| PNT1A | actin      | fibers    | Integrated density                      | cisplatin | 281.6    | 227.1   | 0.217   |
| PNT1A | actin      | fibers    | Integrated density                      | docetaxel | 1372.1   | 233.6   | 0.000   |
| PNT1A | actin      | fibers    | Integrated density                      | Zn        | 765.7    | 230.4   | 0.001   |
| PNT1A | actin      | fibers    | Mean intensity                          | control   | 459.0    | 32.1    | < 2e-16 |
| PNT1A | actin      | fibers    | Mean intensity                          | cisplatin | -87.3    | 37.9    | 0.023   |
| PNT1A | actin      | fibers    | Mean intensity                          | docetaxel | 133.4    | 39.0    | 0.001   |
| PNT1A | actin      | fibers    | Mean intensity                          | Zn        | -41.9    | 38.5    | 0.277   |
| PNT1A | actin      | periphery | Integrated density                      | control   | 765959.0 | 59110.0 | <2e-16  |
| PNT1A | actin      | periphery | Integrated density                      | cisplatin | -64400.0 | 71682.0 | 0.370   |
| PNT1A | actin      | periphery | Integrated density                      | docetaxel | 40700.0  | 72986.0 | 0.578   |
| PNT1A | actin      | periphery | Integrated density                      | Zn        | -36874.0 | 74343.0 | 0.620   |
| PNT1A | actin      | periphery | Median intensity                        | control   | 399.1    | 19.4    | < 2e-16 |
| PNT1A | actin      | periphery | Median intensity                        | cisplatin | -91.3    | 23.6    | 0.000   |
| PNT1A | actin      | periphery | Median intensity                        | docetaxel | 0.5      | 24.0    | 0.984   |
| PNT1A | actin      | periphery | Median intensity                        | Zn        | -85.7    | 24.4    | 0.001   |
| PNT1A | actin      | periphery | Periphery/cell integrated density ratio | control   | 0.8      | 0.0     | <2e-16  |
| PNT1A | actin      | periphery | Periphery/cell integrated density ratio | cisplatin | 0.0      | 0.0     | 0.828   |
| PNT1A | actin      | periphery | Periphery/cell integrated density ratio | docetaxel | 0.0      | 0.0     | 0.568   |
| PNT1A | actin      | periphery | Periphery/cell integrated density ratio | Zn        | 0.0      | 0.0     | 0.712   |
| PNT1A | morphology | cell      | Aspect ratio                            | control   | 2.0      | 0.2     | <2e-16  |
| PNT1A | morphology | cell      | Aspect ratio                            | cisplatin | 0.4      | 0.2     | 0.091   |
| PNT1A | morphology | cell      | Aspect ratio                            | docetaxel | 0.2      | 0.2     | 0.502   |
| PNT1A | morphology | cell      | Aspect ratio                            | Zn        | 0.5      | 0.2     | 0.029   |
| PNT1A | morphology | cell      | Cell area ( $\mu\text{m}^2$ )           | control   | 400.9    | 42.4    | <2e-16  |
| PNT1A | morphology | cell      | Cell area ( $\mu\text{m}^2$ )           | cisplatin | 40.6     | 51.4    | 0.431   |
| PNT1A | morphology | cell      | Cell area ( $\mu\text{m}^2$ )           | docetaxel | 20.0     | 52.3    | 0.702   |
| PNT1A | morphology | cell      | Cell area ( $\mu\text{m}^2$ )           | Zn        | 67.4     | 53.3    | 0.207   |
| PNT1A | morphology | cell      | Maximum caliper ( $\mu\text{m}$ )       | control   | 13.8     | 1.0     | <2e-16  |
| PNT1A | morphology | cell      | Maximum caliper ( $\mu\text{m}$ )       | cisplatin | 1.7      | 1.2     | 0.159   |
| PNT1A | morphology | cell      | Maximum caliper ( $\mu\text{m}$ )       | docetaxel | 0.3      | 1.2     | 0.811   |
| PNT1A | morphology | cell      | Maximum caliper ( $\mu\text{m}$ )       | Zn        | 2.7      | 1.2     | 0.028   |
| PNT1A | morphology | cell      | Roundness                               | control   | 0.6      | 0.0     | <2e-16  |
| PNT1A | morphology | cell      | Roundness                               | cisplatin | -0.1     | 0.0     | 0.036   |

|              |            |           |                                         |           |           |         |         |
|--------------|------------|-----------|-----------------------------------------|-----------|-----------|---------|---------|
| <b>PNT1A</b> | morphology | cell      | Roundness                               | docetaxel | 0.0       | 0.0     | 0.276   |
| <b>PNT1A</b> | morphology | cell      | Roundness                               | Zn        | -0.1      | 0.0     | 0.043   |
| <b>PNT1A</b> | tubulin    | cell      | Integrated density                      | control   | 588131.0  | 55432.0 | <2e-16  |
| <b>PNT1A</b> | tubulin    | cell      | Integrated density                      | cisplatin | -150627.0 | 67222.0 | 0.026   |
| <b>PNT1A</b> | tubulin    | cell      | Integrated density                      | docetaxel | -24497.0  | 68445.0 | 0.721   |
| <b>PNT1A</b> | tubulin    | cell      | Integrated density                      | Zn        | -9799.0   | 69718.0 | 0.888   |
| <b>PNT1A</b> | tubulin    | cell      | Median intensity                        | control   | 208.6     | 8.9     | < 2e-16 |
| <b>PNT1A</b> | tubulin    | cell      | Median intensity                        | cisplatin | -65.2     | 10.8    | 0.000   |
| <b>PNT1A</b> | tubulin    | cell      | Median intensity                        | docetaxel | -0.3      | 11.0    | 0.976   |
| <b>PNT1A</b> | tubulin    | cell      | Median intensity                        | Zn        | -34.5     | 11.3    | 0.002   |
| <b>PNT1A</b> | tubulin    | periphery | Integrated density                      | control   | 390453.0  | 28542.0 | <2e-16  |
| <b>PNT1A</b> | tubulin    | periphery | Integrated density                      | cisplatin | -89172.0  | 34612.0 | 0.011   |
| <b>PNT1A</b> | tubulin    | periphery | Integrated density                      | docetaxel | 1031.0    | 35242.0 | 0.977   |
| <b>PNT1A</b> | tubulin    | periphery | Integrated density                      | Zn        | -11153.0  | 35897.0 | 0.756   |
| <b>PNT1A</b> | tubulin    | periphery | Median intensity                        | control   | 198.5     | 9.1     | < 2e-16 |
| <b>PNT1A</b> | tubulin    | periphery | Median intensity                        | cisplatin | -58.1     | 11.0    | 0.000   |
| <b>PNT1A</b> | tubulin    | periphery | Median intensity                        | docetaxel | 10.0      | 11.2    | 0.373   |
| <b>PNT1A</b> | tubulin    | periphery | Median intensity                        | Zn        | -31.6     | 11.5    | 0.006   |
| <b>PNT1A</b> | tubulin    | periphery | Periphery/cell integrated density ratio | control   | 0.7       | 0.0     | <2e-16  |
| <b>PNT1A</b> | tubulin    | periphery | Periphery/cell integrated density ratio | cisplatin | 0.0       | 0.0     | 0.925   |
| <b>PNT1A</b> | tubulin    | periphery | Periphery/cell integrated density ratio | docetaxel | 0.0       | 0.0     | 0.861   |
| <b>PNT1A</b> | tubulin    | periphery | Periphery/cell integrated density ratio | Zn        | 0.0       | 0.0     | 0.688   |
